# Supplementary material
Source: Springer Nature journal article supplement (https://www.springermedizin.de/resource/supplementary/12891_2009_752_MOESM1_ESM.pdf/9507062)
Supplement: MOESM1 [file 9507062]

Potential study base\*

(n=4870)

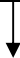

Approached to take part

(n=350)

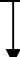

Declined participation

(n=94)

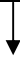

Not eligible#

(n=88)

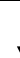

Baseline interviews

(n=168)

Hospital 1 (n=71)

Hospital 2 (n=72)

Hospital 3 (n=12)

Hospital 4 (n=13)
